# Supplementary material for: Mercury capture on a supported chlorocuprate(ii) ionic liquid adsorbent studied using operando synchrotron X-ray absorption spectroscopy
Source: Royal Society of Chemistry journal article supplement (doi:10.1039/c6dt03014a), 2016-01-01
Supplement: c6dt03014a1.pdf [file c6dt03014a1.pdf]

# Mercury capture on a supported chlorocuprate(II) ionic liquid adsorbent studied using *operando* synchrotron X-ray absorption spectroscopy

Roberto Boada,<sup>a</sup> Giannantonio Cibin,<sup>a</sup> Fergal Coleman,<sup>b</sup> Sofia Diaz-Moreno,<sup>a</sup>  
Diego Gianolio,<sup>a</sup> Christopher Hardacre,<sup>b</sup> Shusaku Hayama,<sup>a</sup> John D. Holbrey,<sup>b\*</sup>  
Rafin Ramli,<sup>b</sup> Kenneth R. Seddon,<sup>b</sup> Geetha Srinivasan<sup>b</sup> and Małgorzata Swadźba-Kwaśny<sup>b</sup>

<sup>a</sup> The Diamond Light Source, Harwell Science & Innovation Campus, Didcot,  
Oxfordshire, OX11 0DE.

<sup>b</sup> School of Chemistry and Chemical Engineering, Queen's University Belfast  
BT9 5AG, Northern Ireland. Tel: +44 (0) 28 9097 4836; E-mail: j.holbrey@qub.ac.uk

## Electronic Supplemental Data

### EXAFS of mercury standards, MCA fluorescence data capture times, XANES and IPD data from Hg captured by the supported ionic liquid

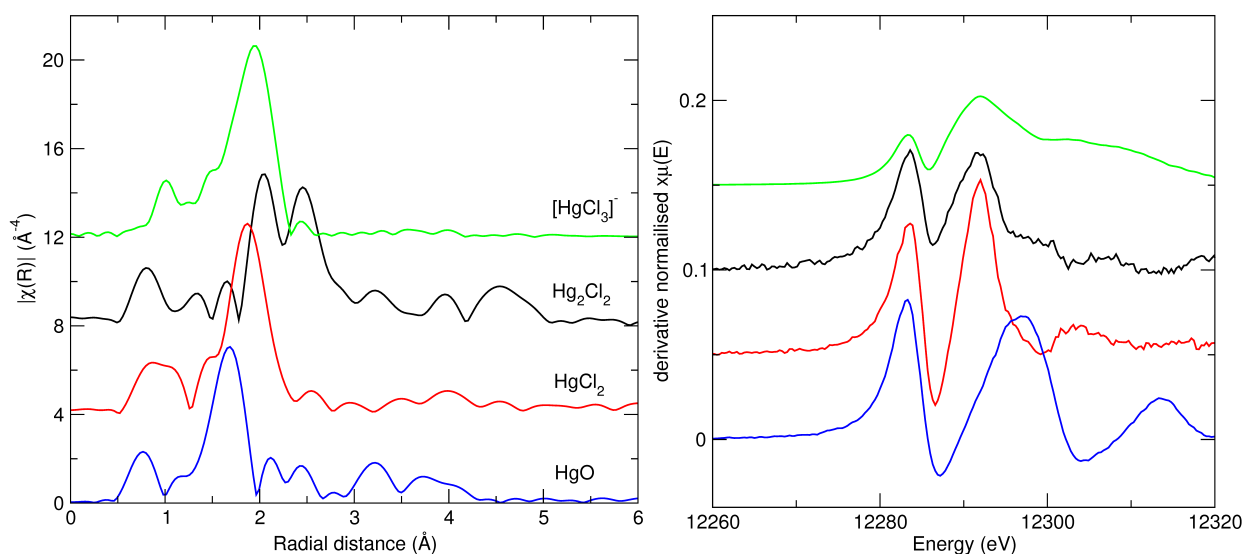

Figure S1:  $k^3$ -weighted mercury EXAFS *pseudo*-radial distribution functions (*left*) and IPD shown from the first derivative of the EXAFS  $L_3$ -edge jump (*right*) for the standards  $\text{Hg}_2\text{Cl}_2$ ,  $\text{HgCl}_2$ ,  $\text{HgO}$ , and  $[\text{HgCl}_3]^-$  from  $[\text{omim}]\text{Cl}/\text{HgCl}_2$   $X=0.50$ . Data collected on beamline I20.

Table S1: IPD values for the mercury standards and chloromercurate(II) ionic liquids.

| Standard                                                     | IPD /eV |
|--------------------------------------------------------------|---------|
| Hg(0)                                                        | 0       |
| HgO                                                          | 12.9    |
| HgCl <sub>2</sub>                                            | 8.5     |
| Hg <sub>2</sub> Cl <sub>2</sub>                              | 8.3     |
| [omim]Cl/HgCl <sub>2</sub> ( $\chi_{\text{HgCl}_2} = 0.33$ ) | 4.8     |
| [omim]Cl/HgCl <sub>2</sub> ( $\chi_{\text{HgCl}_2} = 0.50$ ) | 8.8     |

Table S2: Times of XAS fluorescence data collection at each position in the bed. Averaged times from each cycle of data collection are used for reference in the manuscript.

| Position | Cycle 1 |            | Cycle 2 |           | Cycle 3 |           |
|----------|---------|------------|---------|-----------|---------|-----------|
|          | Time /h | Data set # | Time /h | Data set# | Time /h | Data set# |
| 1        | 02:26   | 198716     | 05:27   | 198776    | 08:28   | 198836    |
| 2        | 02:43   | 198722     | 05:45   | 198782    | 08:46   | 198842    |
| 3        | 03:01   | 198728     | 06:02   | 198788    | 09:04   | 198848    |
| 4        | 03:19   | 198734     | 06:20   | 198794    | 09:22   | 198854    |
| 5        | 03:37   | 198740     | 06:38   | 198800    | 09:39   | 198860    |
| Average  | 03:01   |            | 06:02   |           | 09:03   |           |
| Stdev    | 00:28   |            | 00:27   |           | 00:28   |           |

  

| Position | Cycle 4 |            | Cycle 5 |            | Cycle 6 |            |
|----------|---------|------------|---------|------------|---------|------------|
|          | Time /h | Data set # | Time /h | Data set # | Time /h | Data set # |
| 1        | 11:29   | 198896     | 14:30   | 198956     | 17:31   | 199017     |
| 2        | 11:47   | 198902     | 14:48   | 198962     | 17:49   | 199023     |
| 3        | 12:05   | 198908     | 15:06   | 198968     | 18:07   | 199029     |
| 4        | 12:23   | 198914     | 15:24   | 198974     | 18:25   | 199035     |
| 5        | 12:41   | 198920     | 15:41   | 198980     | 18:42   | 199041     |
| Average  | 12:05   |            | 15:06   |            | 18:07   |            |
| Stdev    | 00:28   |            | 00:28   |            | 00:28   |            |

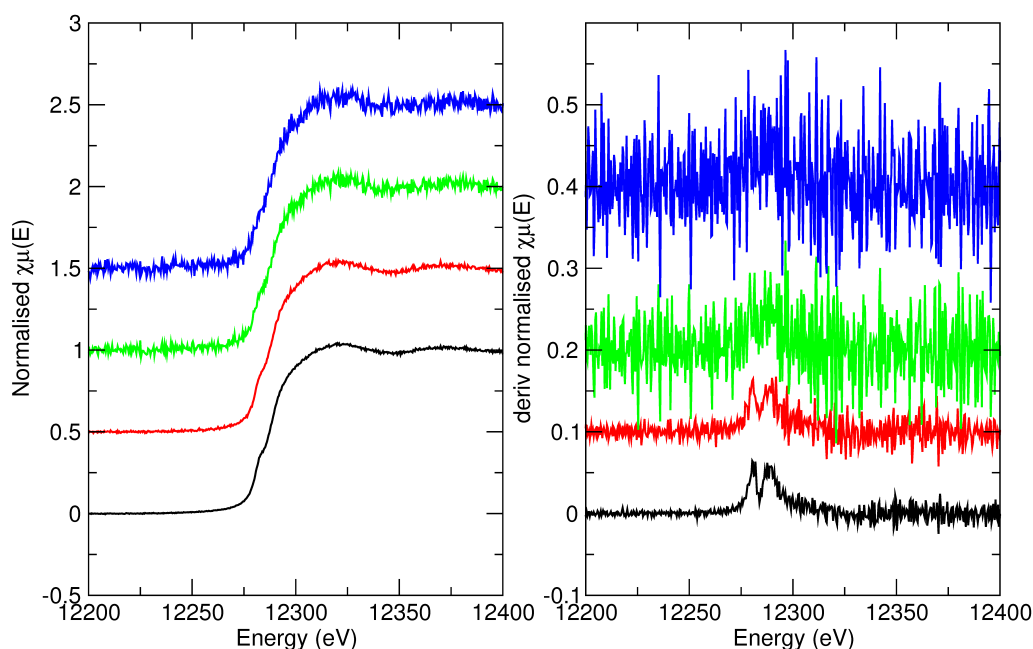

Figure S2: Hg L<sub>3</sub>-edge XANES and first derivative data for adsorbed mercury on the supported ionic liquid bed taken after 3 h from the start of the experiment at positions 1 (black), 2 (red), 3 (green) and 4 (blue) along the bed. No mercury L<sub>3</sub>-edge jump could be detected at position 5.

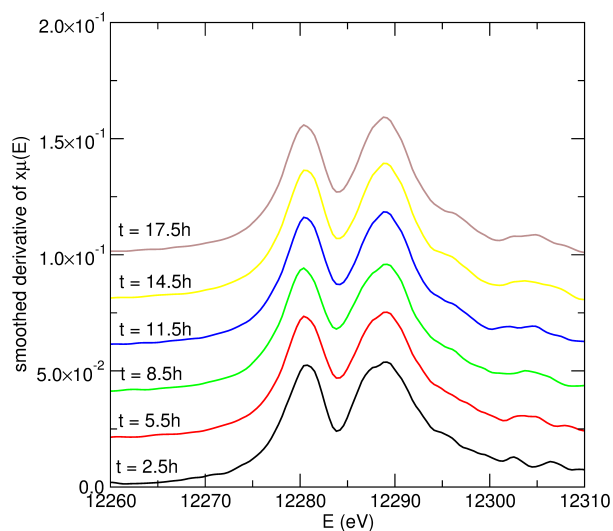

Figure S3: Change in the inflection point difference spectra for the Hg L<sub>3</sub> XANES data from position 1 (front edge of the adsorbant bed) through the experiment. Data collected on beamline B18.

Table S3: Change in the inflection point difference in the Hg L<sub>3</sub> XANES data from position 1 (front edge of the adsorbant bed) through the experiment. Throughout the experiment, the IPD value is 8.45 eV (stdev 0.19), in the range of both Hg(II)-Cl and Hg(I)-Cl compounds.

| Hg(0) exposure time/ hour | Inflection point difference (IPD)/ eV |
|---------------------------|---------------------------------------|
| 2.5                       | 8.2                                   |
| 5.5                       | 8.3                                   |
| 8.5                       | 8.7                                   |
| 11.5                      | 8.4                                   |
| 14.5                      | 8.6                                   |
| 17.5                      | 8.5                                   |
